# Supplementary material
Source: PubMed Central journal article supplement (PMC2910250)

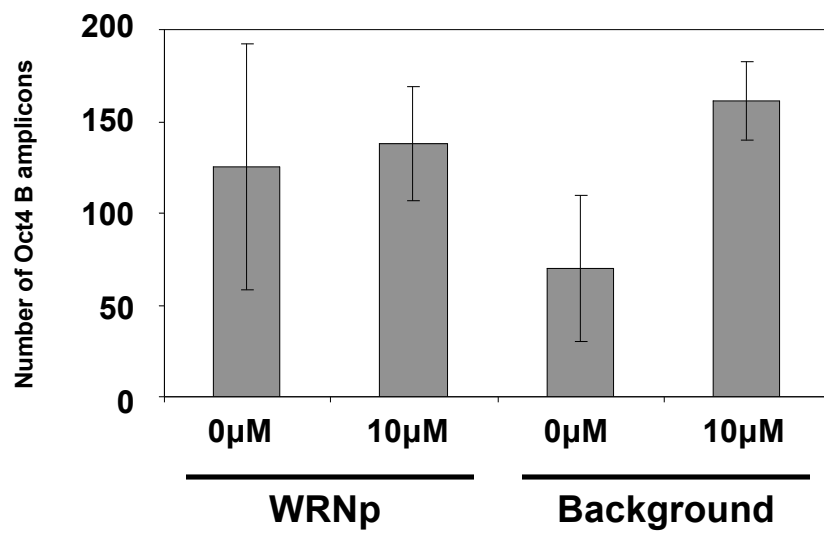

**A**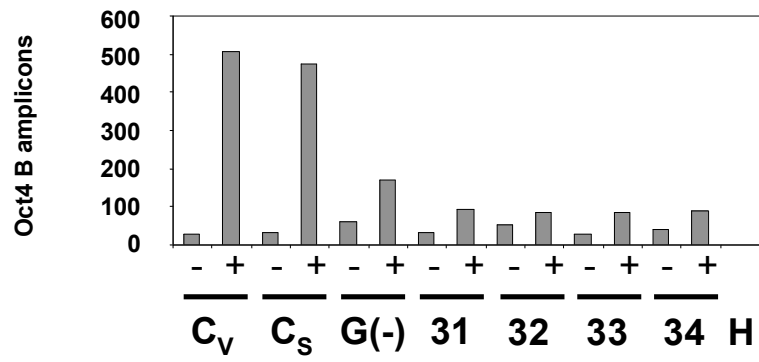**B**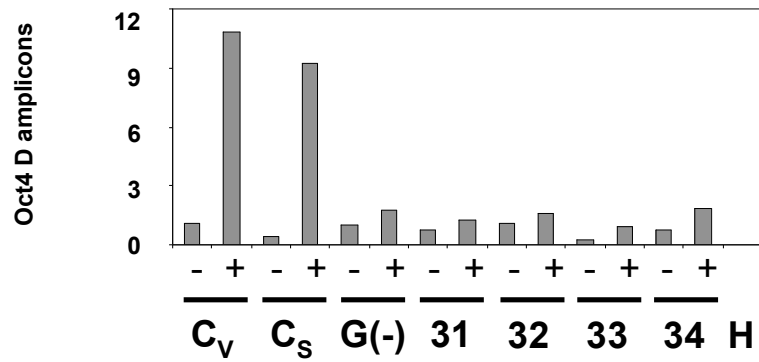**C**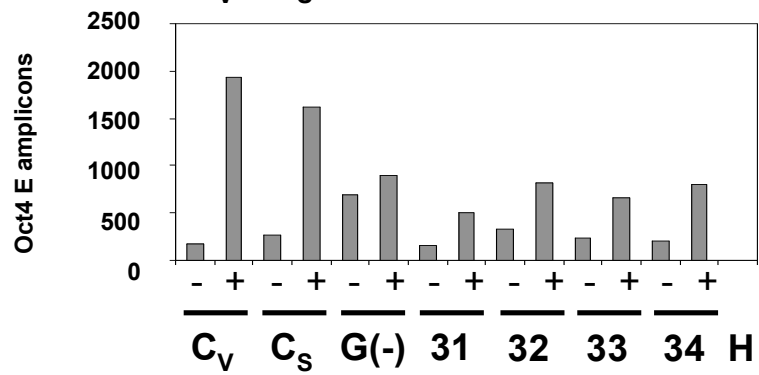**D**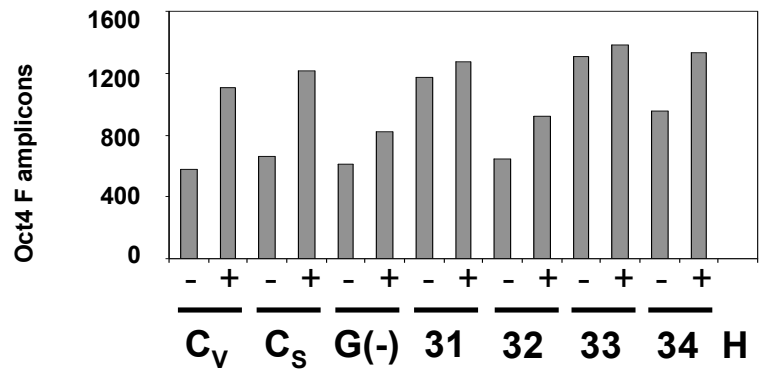**E**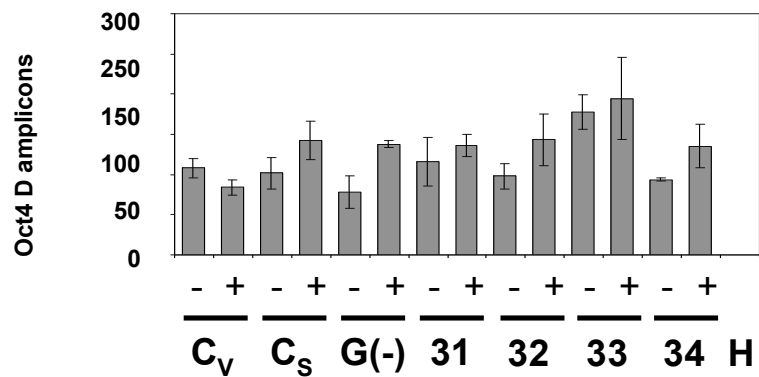

Supplementary Figure 2

**A**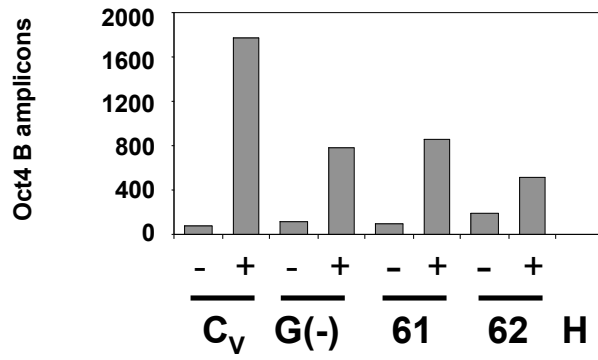**B**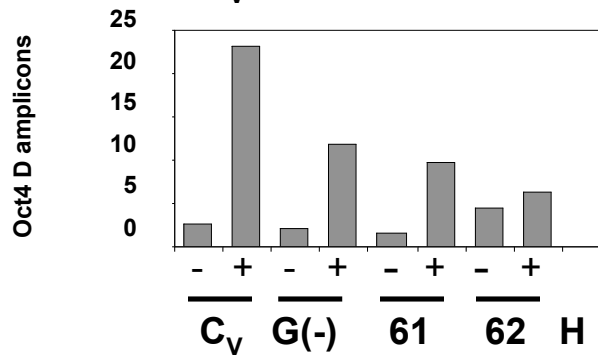**C**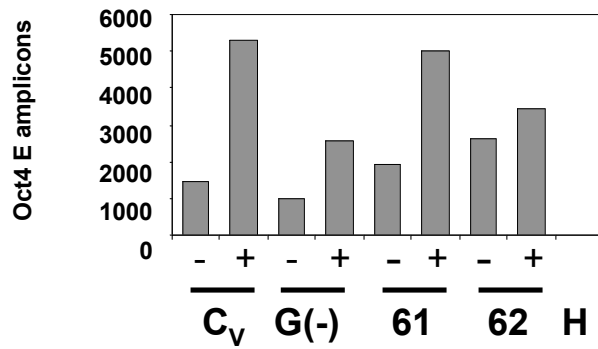**D**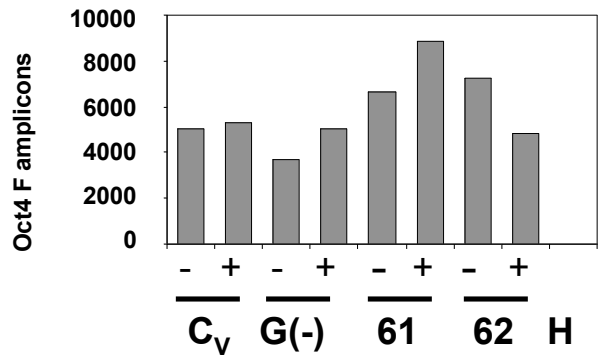**E**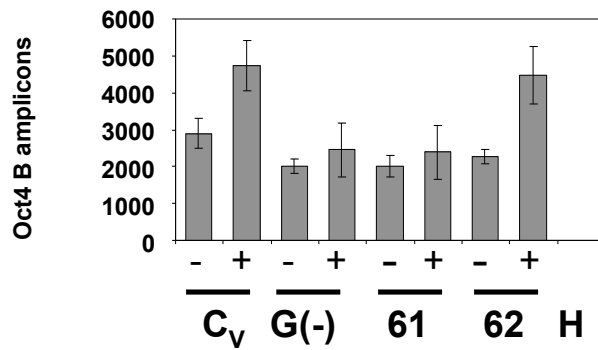

**A**

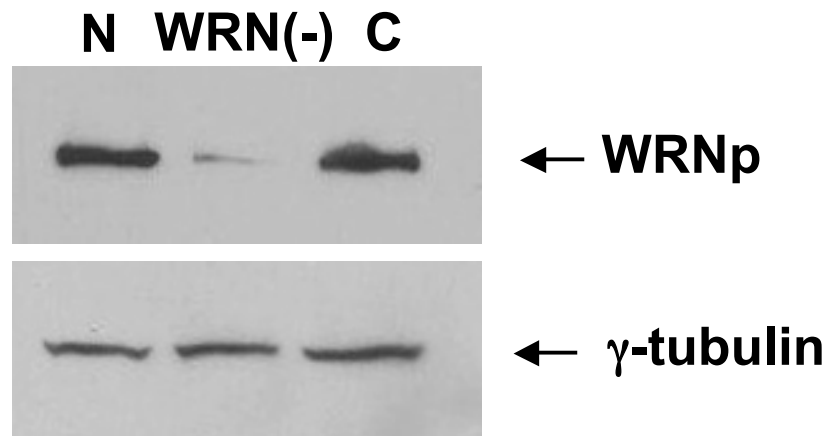

**B**

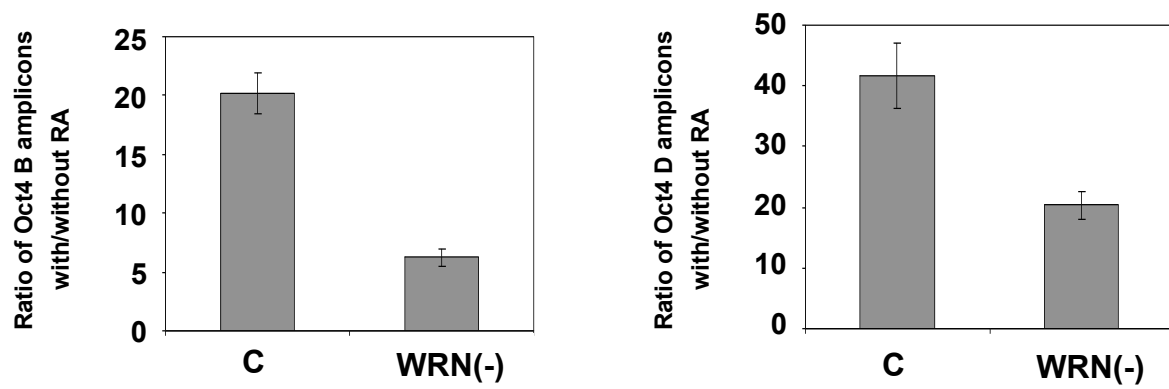

|               | <b>Transduced fibroblasts</b> | <b>Digested/Undigested Oct4B amplicons</b> |
|---------------|-------------------------------|--------------------------------------------|
| <b>siRNA:</b> | Ci                            | 1.26                                       |
|               | Wi                            | 1.87                                       |
|               | Mock                          | 2                                          |
| <b>shRNA:</b> | Mock                          | 2.26                                       |
|               | C                             | 1.7                                        |
|               | WRN(-)                        | 2.31                                       |

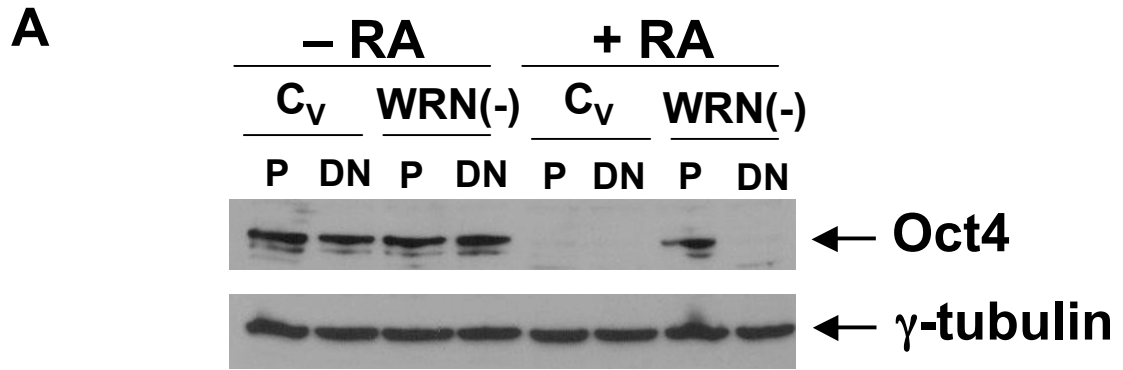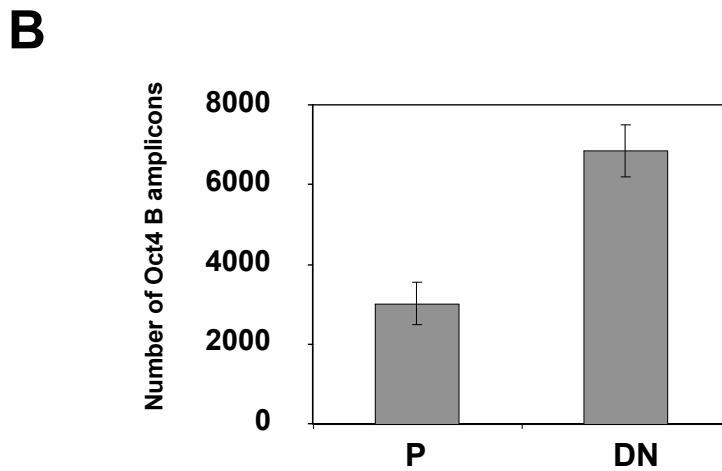

Supplement: NIHMS206762-supplement-Supp_Fig_1-6.pdf [file NIHMS206762-supplement-Supp_Fig_1-6.pdf]
